# Supplementary material
Source: HighWire-hosted journal article supplement (https://www.ajnr.org/highwire/filestream/102437/field_highwire_adjunct_files/0/0916.pdf)
Supplement: 0916.pdf [file 0916.pdf]

**Supplemental Table 1: Voxel counts of additional WM ROIs.**

| ROI         | Voxel Count | Voxels with Significant Pre-Post Decreases |
|-------------|-------------|--------------------------------------------|
|             |             | RD (%)                                     |
| Left Fornix | 401         | 25 (6.2)                                   |
| Left RPIC   | 753         | 49 (6.5)                                   |
| Left SFOF   | 1388        | 165 (11.9)                                 |

**Note:**— RPIC indicates retrolenticular part of the internal capsule; SFOF, superior fronto-occipital fasciculus.
